# Supplementary material for: Different Ecological Niches of Poisonous Aristolochia clematitis in Central and Marginal Distribution Ranges—Another Contribution to a Better Understanding of Balkan Endemic Nephropathy
Source: MDPI journal article supplement (doi:10.3390/plants12173022), 2023-08-22
Supplement: s1 [file s1]

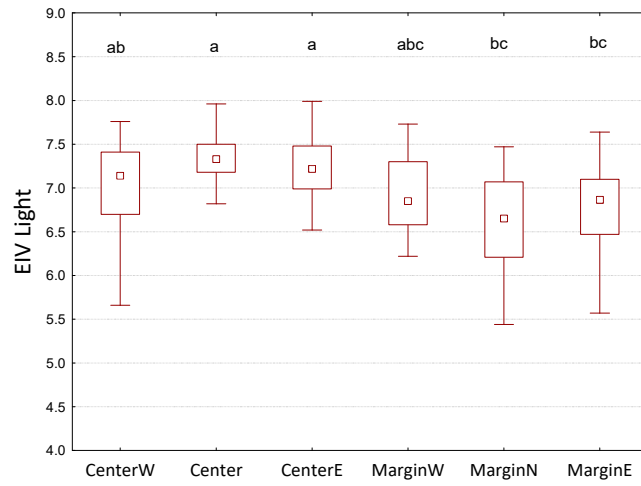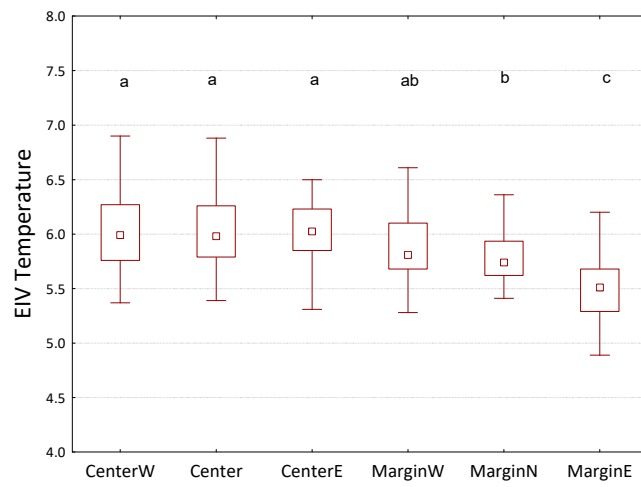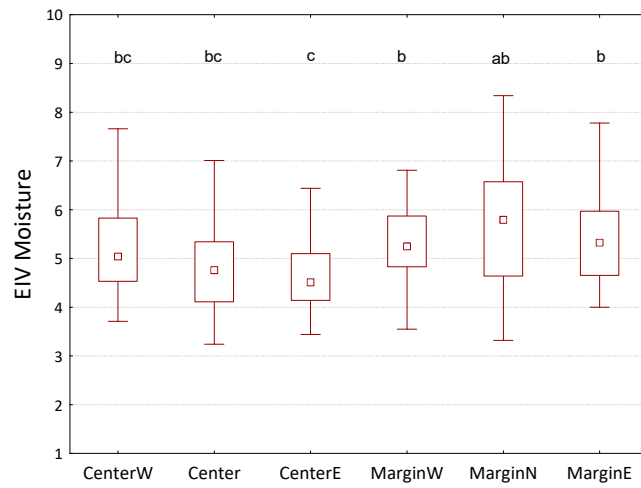

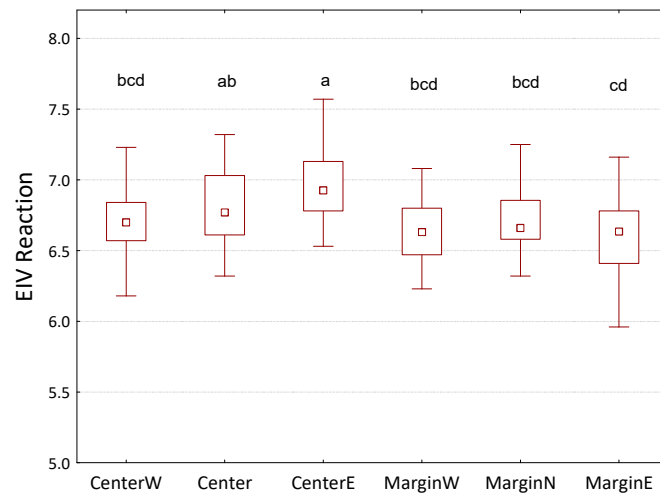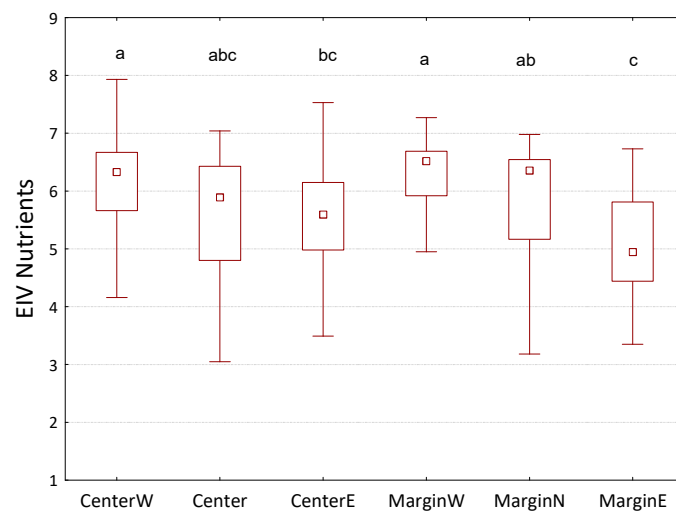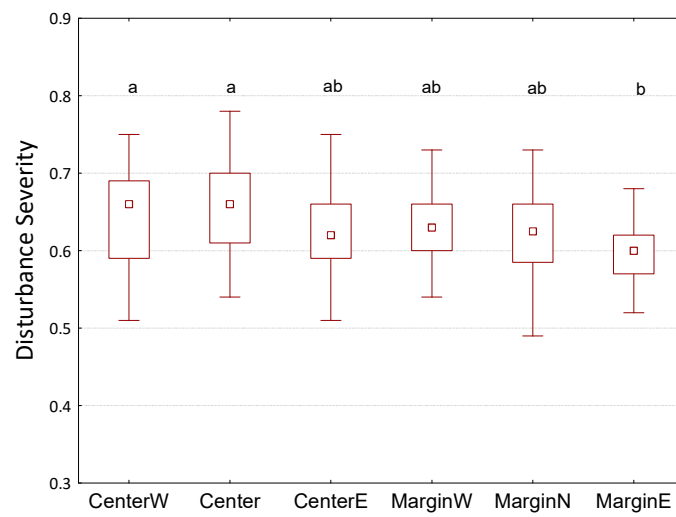

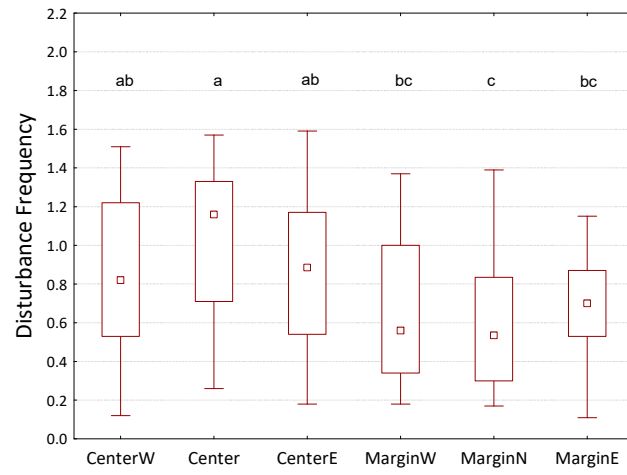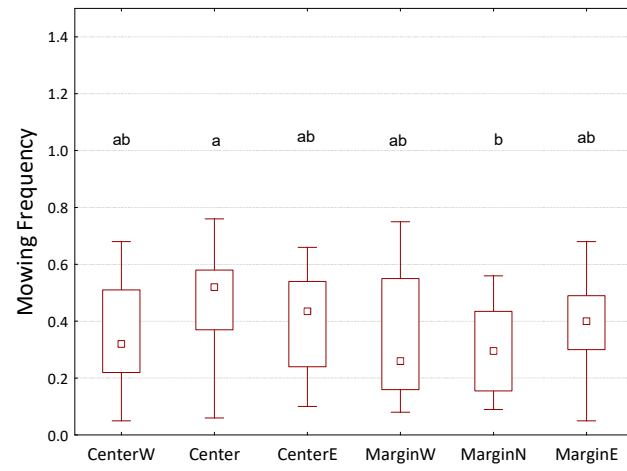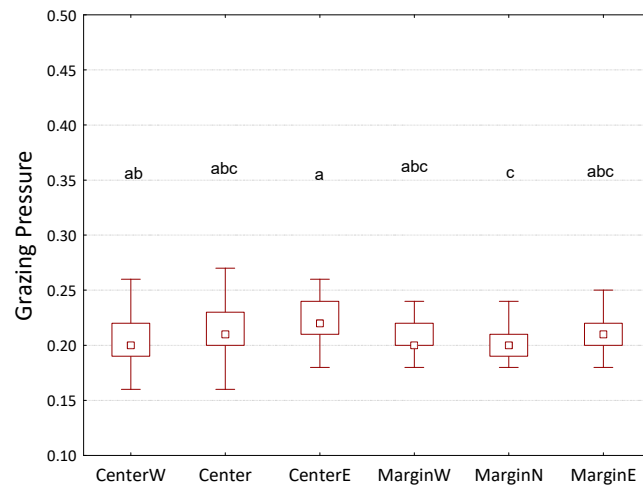

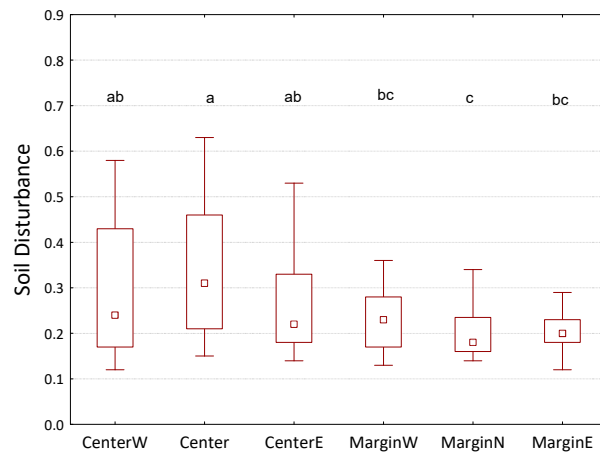

Figure S4. Ellenberg-type and disturbance indicator values of the vegetation plots classified into three marginal and three central regions. Boxes show the 25-75% quartile range and the median value, whiskers indicate the range of values.
