# Supplementary material for: Different Ecological Niches of Poisonous Aristolochia clematitis in Central and Marginal Distribution Ranges—Another Contribution to a Better Understanding of Balkan Endemic Nephropathy
Source: MDPI journal article supplement (doi:10.3390/plants12173022), 2023-08-22
Supplement: s1 [file s1]

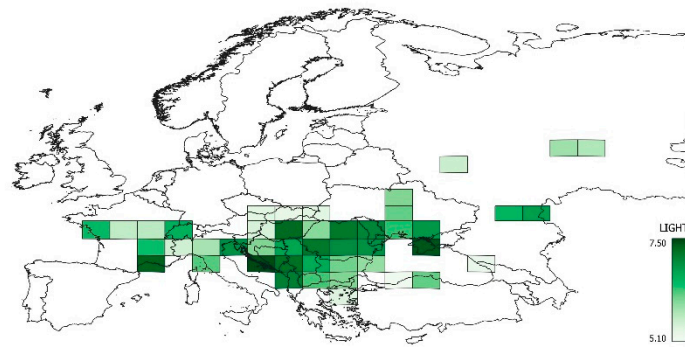

A Ellenberg-type indicator values for Light

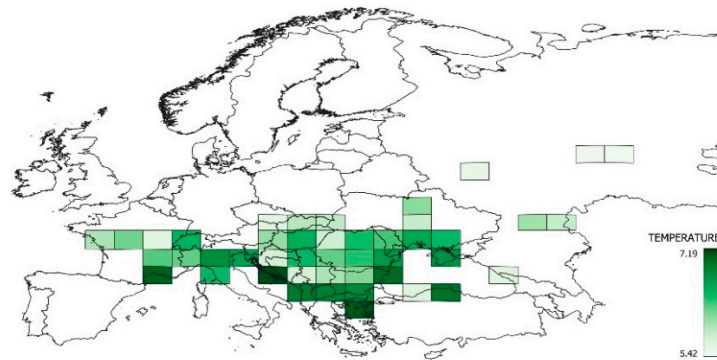

B Ellenberg-type indicator values for Temperature

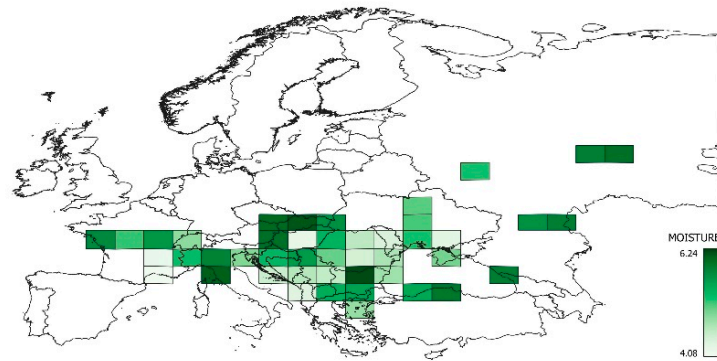

C Ellenberg-type indicator values for Moisture

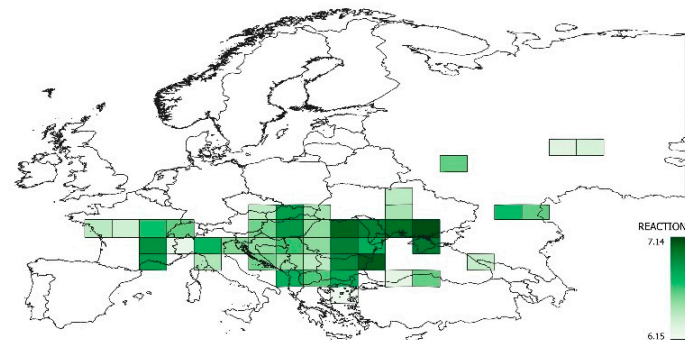

D Ellenberg-type indicator values for Soil Reaction

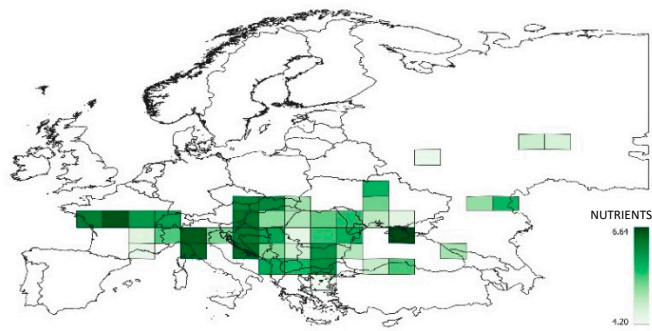

E Ellenberg-type indicator values for Soil Nutrients

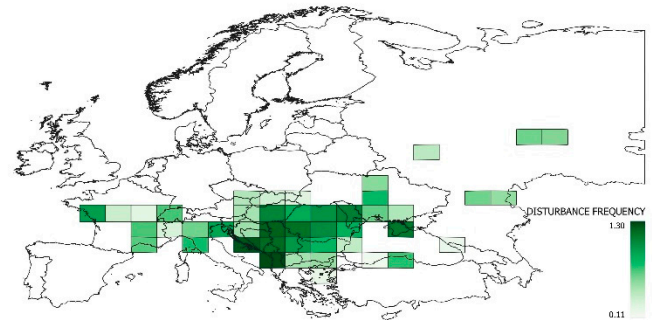

F Indicator values for Disturbance Frequency

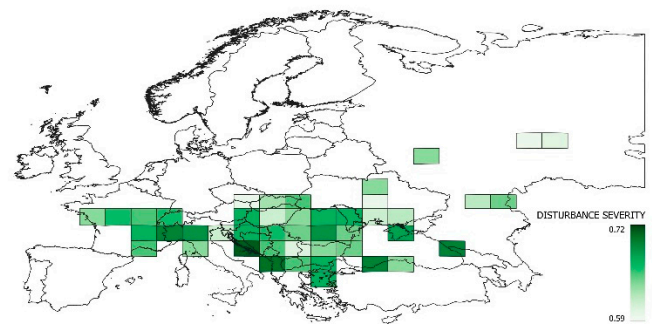

G Indicator values for Disturbance Severity

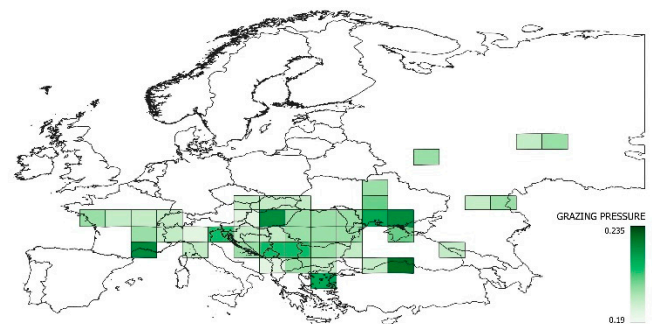

H Indicator values for Grazing Pressure

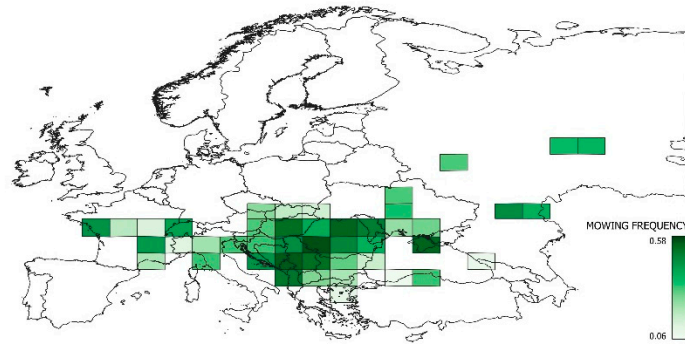

I Indicator values for Mowing Frequency

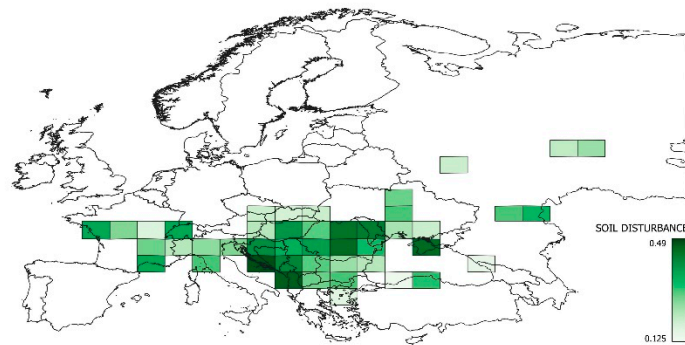

J Indicator values for Soil Disturbance

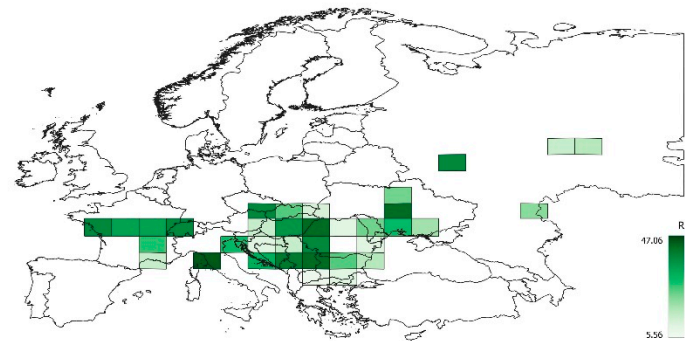

K Percentage of grassland habitatas

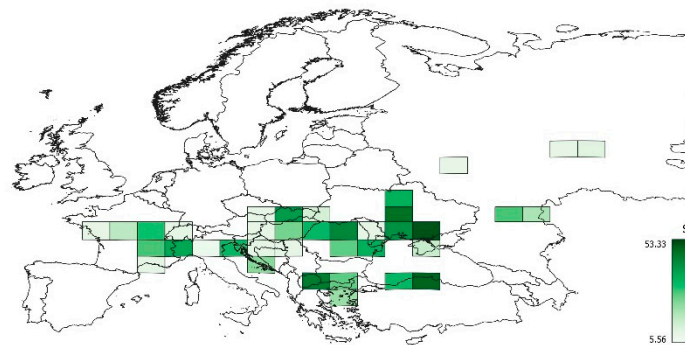

L Percentage of scrub habitatas

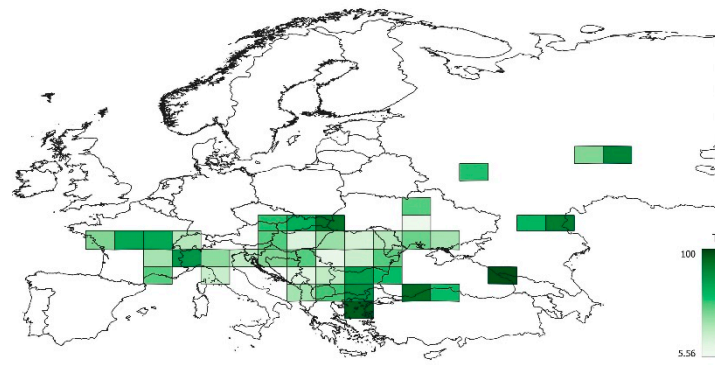

M Percentage of forest habitats

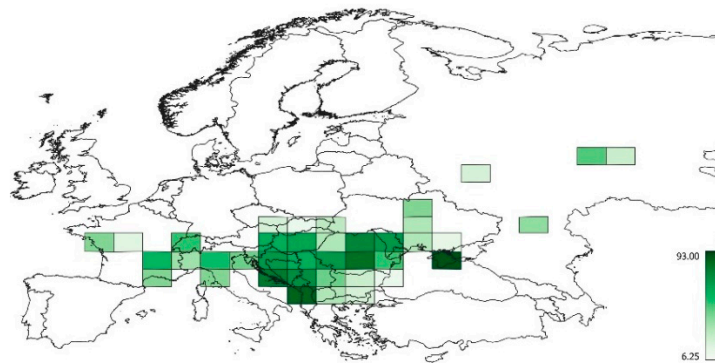

N Percentage of man-made habitats

Figure S3. Medians of environmental variables across MGRS cells
