# Supplementary material for: Different Ecological Niches of Poisonous Aristolochia clematitis in Central and Marginal Distribution Ranges—Another Contribution to a Better Understanding of Balkan Endemic Nephropathy
Source: MDPI journal article supplement (doi:10.3390/plants12173022), 2023-08-22
Supplement: s1 [file s1]

Table S2. Descriptive statistics for the bioclimatic variables calculated on a whole dataset (851 vegetation plots)

| Variable |                                                                                                 | Arithmetic Mean | SD    | Min   | Max    |
|----------|-------------------------------------------------------------------------------------------------|-----------------|-------|-------|--------|
| BIO1     | Mean annual air temperature °C                                                                  | 10.8            | 2.7   | 0.8   | 18.1   |
| BIO2     | mean diurnal air temperature range °C                                                           | 8.3             | 1.4   | 2.4   | 11.4   |
| BIO3     | Isothermality °C                                                                                | 0.3             | 0.0   | 0.1   | 0.4    |
| BIO4     | Temperature seasonality °C/100                                                                  | 795.5           | 152.5 | 470.5 | 1187.1 |
| BIO5     | Mean daily maximum air temperature of the warmest month °C                                      | 26.4            | 2.4   | 15.5  | 33.5   |
| BIO6     | Mean daily minimum air temperature of the coldest month °C                                      | -3.6            | 4.1   | -14.4 | 7.2    |
| BIO7     | Annual range of air temperature °C                                                              | 30.0            | 4.3   | 16.6  | 39.8   |
| BIO8     | Mean daily mean air temperatures of the wettest quarter °C                                      | 15.7            | 5.5   | -0.7  | 23.2   |
| BIO9     | Mean daily mean air temperatures of the driest quarter °C                                       | 7.4             | 9.2   | -7.5  | 26.6   |
| BIO10    | Mean daily mean air temperatures of the warmest quarter °C                                      | 21.0            | 2.2   | 10.0  | 26.6   |
| BIO11    | Mean daily mean air temperatures of the coldest quarter °C                                      | 0.6             | 4.2   | -10.9 | 10.4   |
| BIO12    | Annual precipitation amount kg m <sup>-2</sup> year                                             | 714.4           | 293.3 | 275.7 | 2233.7 |
| BIO13    | Precipitation amount of the wettest month kg m <sup>-2</sup> month <sup>-1</sup>                | 88.5            | 36.5  | 29.8  | 250.2  |
| BIO14    | Precipitation amount of the driest month kg m <sup>-2</sup> month <sup>-1</sup>                 | 36.1            | 17.4  | 6.4   | 122.2  |
| BIO15    | Precipitation seasonality kg m <sup>-2</sup>                                                    | 26.9            | 10.8  | 10.8  | 85.9   |
| BIO16    | Mean monthly precipitation amount of the wettest quarter kg m <sup>-2</sup> month <sup>-1</sup> | 241.6           | 103.3 | 82.7  | 726.7  |
| BIO17    | Mean monthly precipitation amount of the driest quarter kg m <sup>-2</sup> month <sup>-1</sup>  | 123.4           | 58.5  | 25.1  | 412.6  |
| BIO18    | Mean monthly precipitation amount of the warmest quarter kg m <sup>-2</sup> month <sup>-1</sup> | 185.9           | 71.8  | 25.1  | 579.9  |
| BIO19    | Mean monthly precipitation amount of the coldest quarter kg m <sup>-2</sup> month <sup>-1</sup> | 164.4           | 94.9  | 61.2  | 560.2  |
