# Supplementary material for: Different Ecological Niches of Poisonous Aristolochia clematitis in Central and Marginal Distribution Ranges—Another Contribution to a Better Understanding of Balkan Endemic Nephropathy
Source: MDPI journal article supplement (doi:10.3390/plants12173022), 2023-08-22
Supplement: s1 [file s1]

A

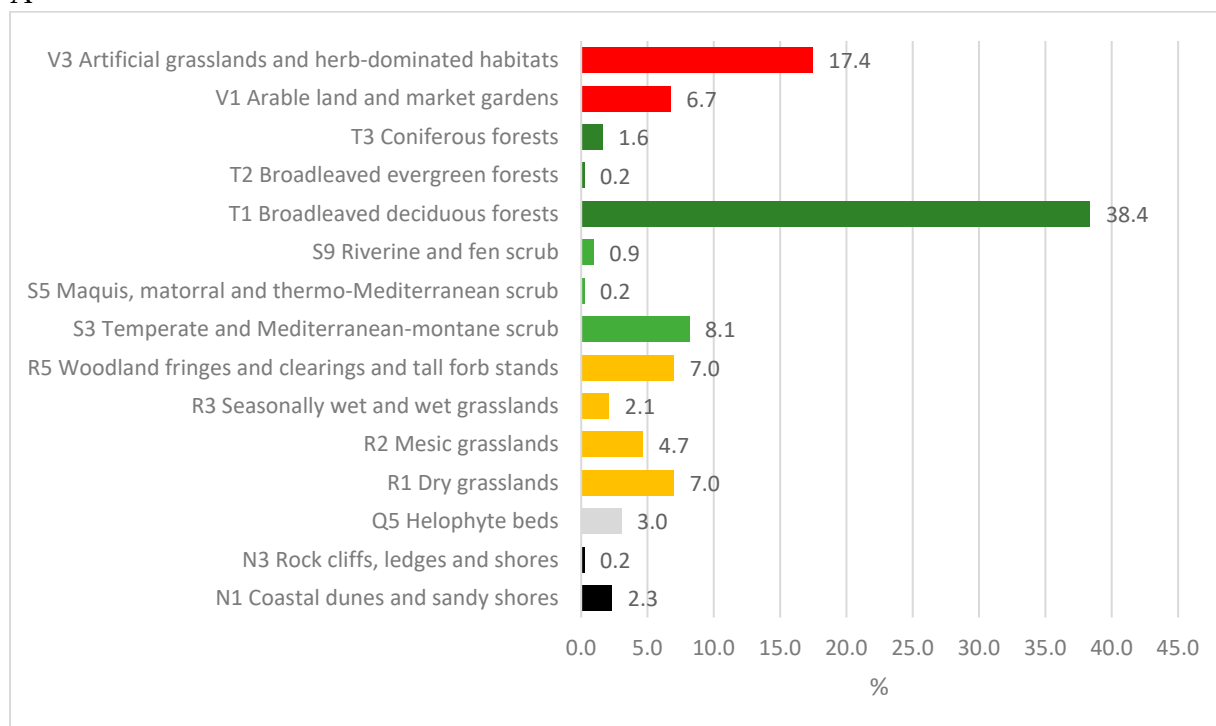

B

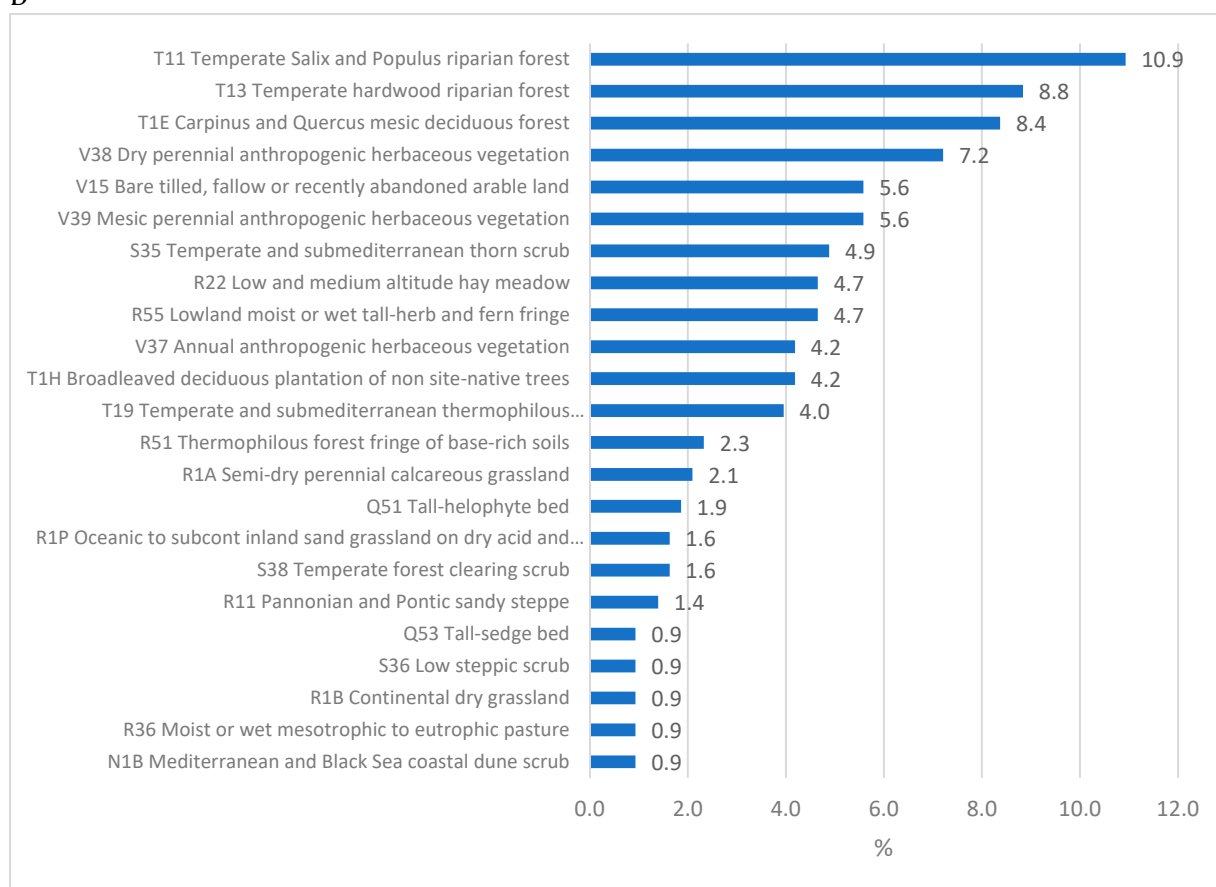

C

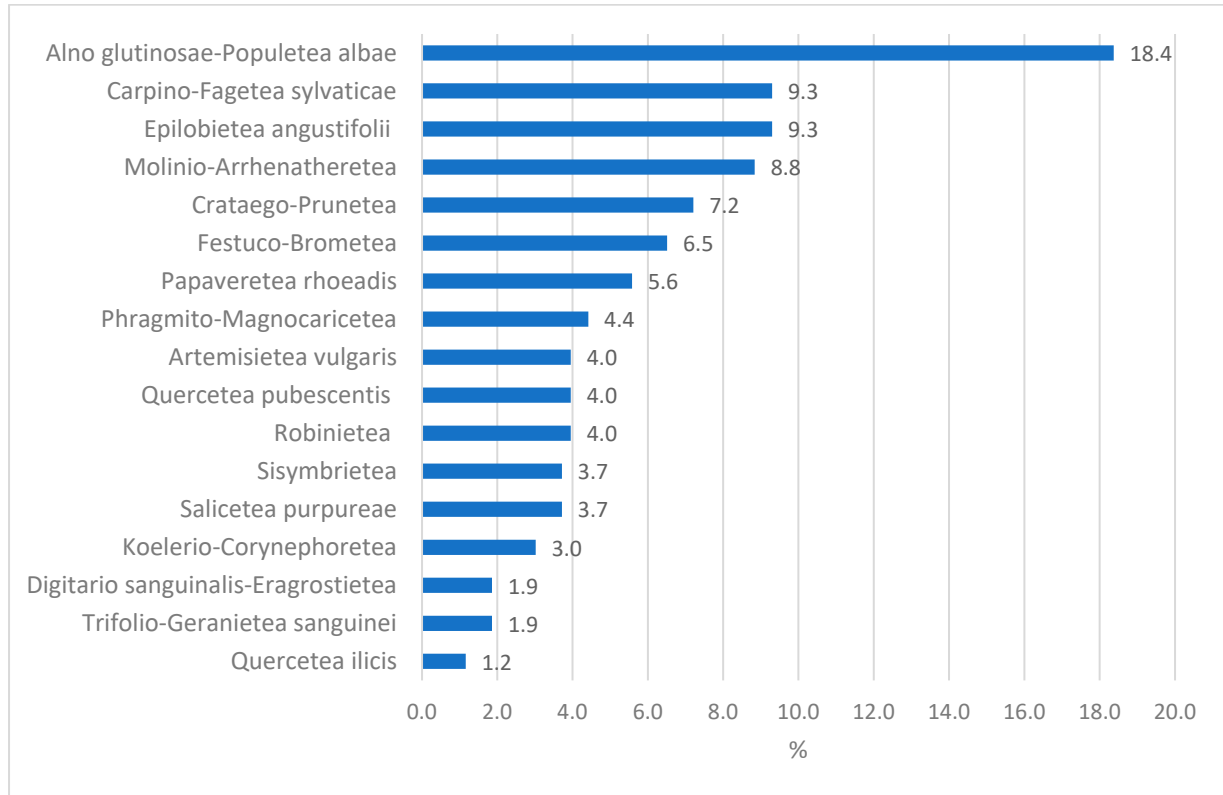

Figure S2. Percentage of EUNIS habitat types and vegetation classes in the whole dataset (851 vegetation plots)

A Percentage of EUNIS habitat types (level 2)

B Percentage of the most frequent EUNIS habitat types (level 3)

C Percentage of the most frequent vegetation classes
