# Supplementary material for: Different Ecological Niches of Poisonous Aristolochia clematitis in Central and Marginal Distribution Ranges—Another Contribution to a Better Understanding of Balkan Endemic Nephropathy
Source: MDPI journal article supplement (doi:10.3390/plants12173022), 2023-08-22
Supplement: s1 [file s1]

Table S1. Contributing vegetation-plot databases with Global Index Vegetation-plot Databases (GIVD; [www.givd.info](http://www.givd.info)) codes, names and number of their plots included in the final stratified and resampled dataset (final number of plots = 851). NA – databases not included in GIVD

| GIVD code | Database name                                                    | No. of veg. plots | Custodian            |
|-----------|------------------------------------------------------------------|-------------------|----------------------|
| EU-FR-003 | SOPHY                                                            | 77                | Emmanuel Garbolino   |
| EU-RO-008 | Romanian Grassland Database                                      | 77                | Eszter Ruprecht      |
| EU-00-019 | Balkan Vegetation Database                                       | 52                | Kiril Vassilev       |
| EU-00-028 | European Weed Vegetation Database                                | 51                | Filip Kůzmič         |
| EU-RU-011 | Vegetation Database of Tatarstan                                 | 39                | Vadim Prokhorov      |
| EU-RU-002 | Lower Volga Valley Phytosociological Database                    | 38                | Valentin Golub       |
| EU-SK-001 | Slovak Vegetation Database                                       | 34                | Milan Valachovič     |
| EU-UA-011 | Ukrainian Anthropogenic VDB                                      | 34                | Tetiana Dziuba       |
| 00-TR-003 | Non-Forest Vegetation Database of Turkey - NFVDT                 | 30                | Behlül Güler         |
| EU-00-030 | Eastern European Steppe Database                                 | 26                | Denys Vynokurov      |
| EU-HR-002 | Croatian Vegetation Database                                     | 25                | Željko Škvorc        |
| EU-HU-003 | CoenoDat Hungarian Phytosociological Database                    | 23                | János Csiky          |
| EU-RO-007 | Romanian Forest Database                                         | 23                | Adrian Indreica      |
| EU-IT-021 | AMS-VegBank - Alma Mater Studiorum - University of Bologna       | 20                | Alessandro Chiarucci |
| EU-UA-001 | Ukrainian Grassland Database                                     | 18                | Anna Kuzemko         |
| EU-00-026 | CircumMed Forest database                                        | 17                | Gianmaria Bonari     |
| EU-IT-011 | Vegetation Plot Database - Sapienza University of Rome           | 17                | Emiliano Agrillo     |
| EU-00-013 | Balkan Dry Grasslands Database                                   | 16                | Kiril Vassilev       |
| EU-RU-014 | Temperate Forests of European Russia                             | 16                | Larisa Khanina       |
| EU-IT-001 | VegItaly                                                         | 15                | Roberto Venanzoni    |
| EU-00-027 | European Boreal Forest Vegetation Database                       | 14                | Anni Kanerva Jašková |
| EU-GR-005 | Hellenic Natura 2000 Vegetation Database (HelNatVeg)             | 14                | Panayotis Dimopoulos |
| EU-00-031 | Masaryk University's Gap-Filling Database of European Vegetation | 13                | Milan Chytrý         |
| EU-UA-006 | Vegetation Database of Ukraine and Adjacent Parts of Russia      | 12                | Viktor Onyshchenko   |
| EU-FR-004 | VEGFRANCE                                                        | 12                | Jan-Bernard Bouzillé |
| EU-UA-005 | Halophytic and coastal vegetation database of Ukraine            | 11                | Tetiana Dziuba       |
| EU-CZ-001 | Czech National Phytosociological Database                        | 9                 | Milan Chytrý         |
| EU-UA-010 | Ukraine Psammophytic VDB                                         | 9                 | Tetiana Dziuba       |
| EU-FR-006 | SIMETHIS-Flore-CBNMed                                            | 9                 | Olivier Argagnon     |
| EU-AT-001 | Austrian Vegetation Database                                     | 8                 | Wolfgang Willner     |
| EU-NL-001 | Dutch National Vegetation Database                               | 8                 | Stephan Hennekens    |

|                          |                                                                                                                     |   |                             |
|--------------------------|---------------------------------------------------------------------------------------------------------------------|---|-----------------------------|
| EU-RS-003 +<br>EU-RS-004 | Database of Forest Vegetation in Republic of Serbia + Vegetation Database of Northern Part of Serbia (AP Vojvodina) | 8 | Mirjana Krstivojević<br>Ćuk |
| 00-TR-001                | Forest Vegetation Database of Turkey - FVDT                                                                         | 8 | Ali Kavgacı                 |
| EU-RS-002                | Vegetation Database Grassland Vegetation of Serbia                                                                  | 7 | Svetlana Aćić               |
| EU-SI-001                | Vegetation Database of Slovenia                                                                                     | 7 | Urban Šilc                  |
| NA                       | Bosnia and Herzegovina                                                                                              | 7 | Vladimir Stupar             |
| AS-TR-002                | Vegetation Database of Oak Communities in Turkey                                                                    | 6 | Emin Uğurlu                 |
| EU-00-016                | Mediterranean Ammophiletea database                                                                                 | 4 | Corrado Marcenò             |
| EU-DE-014                | German Vegetation Reference Database (GVRD)                                                                         | 4 | Ute Jandt                   |
| EU-ME-001                | Vegetation Database of Montenegro                                                                                   | 4 | Milica Stanišić-Vujačić     |
| EU-DE-013                | VegetWeb Germany                                                                                                    | 3 | Florian Jansen              |
| EU-GR-006 +<br>EU-GR-007 | Hellenic Woodland Database + Hellenic Beech Forests Database (Hell-Beech-DB)                                        | 3 | Ioannis Tsiripidis          |
| EU-00-002                | Nordic-Baltic Grassland Vegetation Database (NBGVD)                                                                 | 3 | Jürgen Dengler              |
| EU-PL-001                | Polish Vegetation Database                                                                                          | 3 | Zygmunt Kącki               |
| EU-00-023                | Iberian and Macaronesian Vegetation Information System (SIVIM) – Deciduous Forests                                  | 3 | Juan Antonio Campos         |
| EU-IT-010                | Vegetation database of Habitats in the Italian Alps - HabItAlp                                                      | 2 | Laura Casella               |
| NA                       | Steppe vegetation Rostov Region Database                                                                            | 2 | Olga Demina                 |
| EU-CH-011                | Monitoring Effectiveness of Habitat Conservation in Switzerland                                                     | 2 | Ariel Bergamini             |
| EU-BE-002                | INBOVEG                                                                                                             | 1 | Sophie Vermeersch           |
| EU-BG-001                | Bulgarian Vegetation Database                                                                                       | 1 | Iva Apostolova              |
| EU-00-017                | European Coastal Vegetation Database                                                                                | 1 | John Janssen                |
| EU-DE-020                | German Grassland Vegetation Database (GrassVeg.DE)                                                                  | 1 | Ricarda Pätsch              |
| EU-00-021                | SE Europe forest database                                                                                           | 1 | Andraž Čarni                |
| EU-00-020                | WetVegEurope                                                                                                        | 1 | Flavia Landucci             |
| EU-00-004                | Iberian and Macaronesian Vegetation Information System (SIVIM)                                                      | 1 | Borja Jiménez-Alfaro        |
| EU-MK-001                | Vegetation Database of the Republic of Macedonia                                                                    | 1 | Renata Ćušterevska          |
